# Supplementary material
Source: PubMed Central journal article supplement (PMC3516440)
Supplement: supp_125.18.4354_JCS104919.pdf [file supp_125.18.4354_JCS104919.pdf]

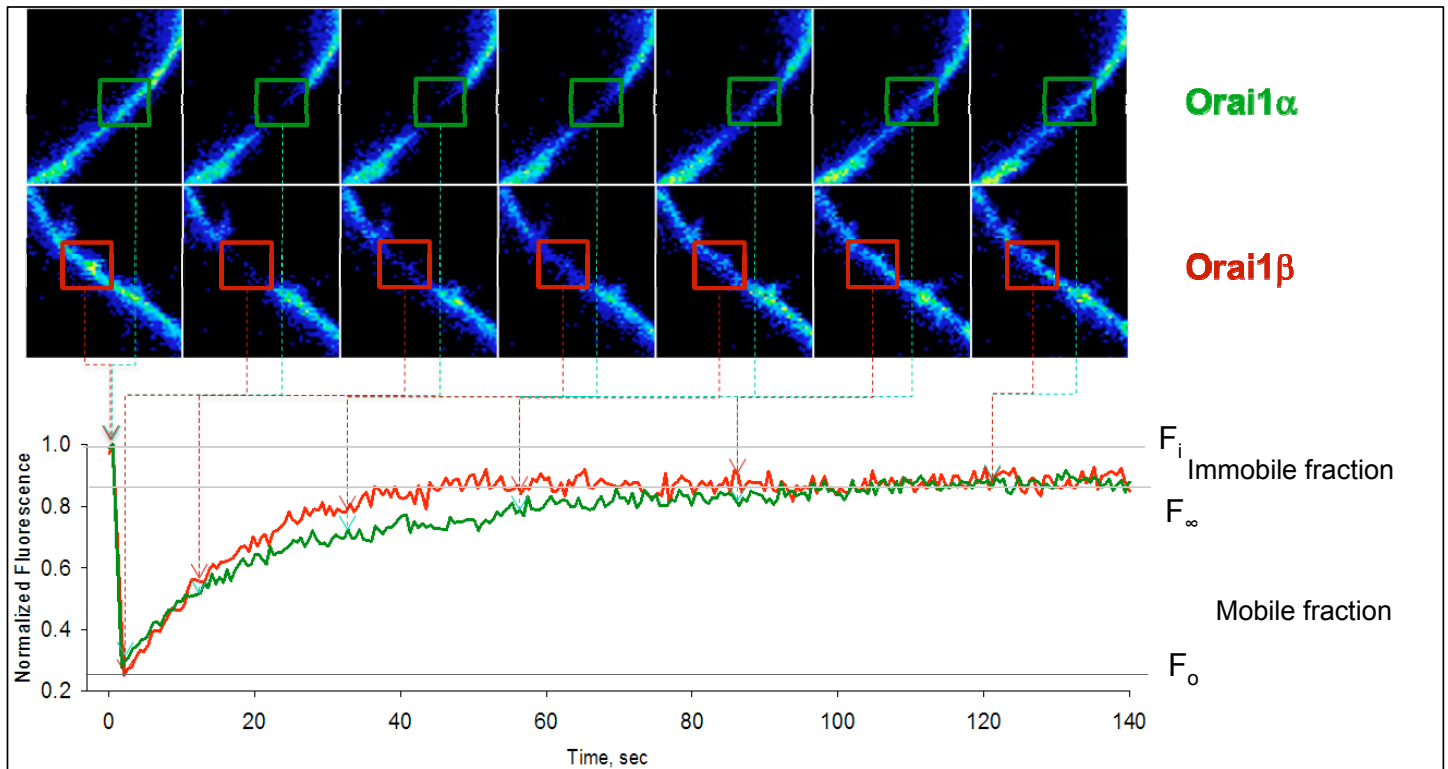

**Fig. S1. Data for single FRAP rate determinations, as described in Methods.** The difference between the fluorescence intensities at the asymptote ( $F_i$ ) and that immediately following the bleach ( $F_0$ ) were normalized to 1.0 at each curve before fitting with two exponential. Mobile fraction calculated as  $F_\infty - F_0$ .

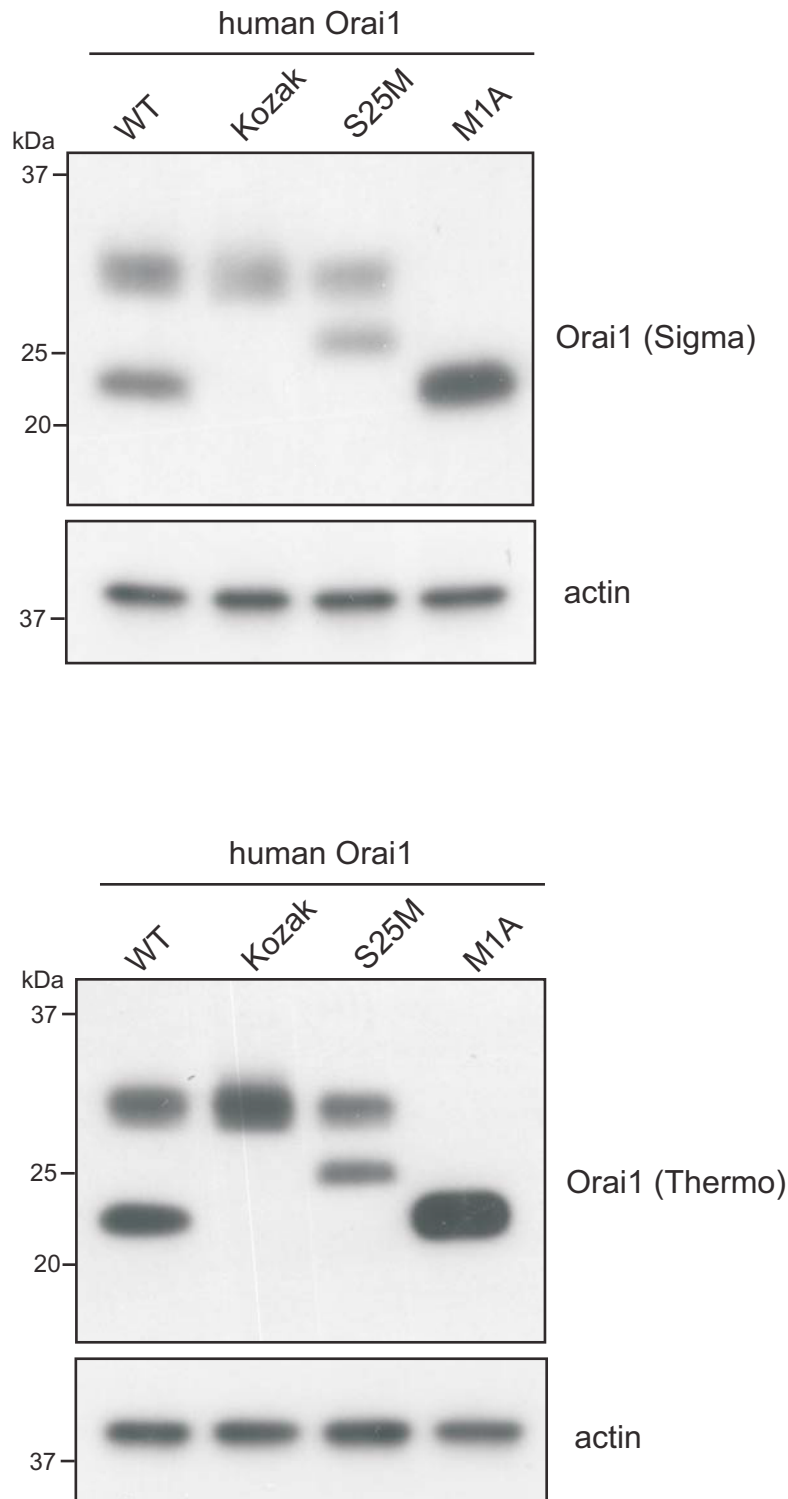

**Fig. S2. Orai1 protein can be translated from an artificially introduced start codon after a leaky first start site.** Western blot showing heterogeneously-expressed Orai1 proteins in HEK293 cells transfected with the cDNAs of WT with native 5'-UTR, WT with Kozak, S25M mutant and M1A mutant of Orai1. Cells were lysed in RIPA buffer. After overnight treatment with PNGaseF, samples were dissolved by 10% SDS-PAGE and analyzed by Western blotting using an anti-Orai1 antibody. Upper panel shows the blots probed with anti-Orai1 antibody purchased from Sigma whose epitope is <sup>288</sup>HRGDHPLTPGSHYA<sup>301</sup> or one from Thermo whose epitope is <sup>203</sup>KKQPGQPRPTSKP<sup>215</sup> in human Orai1 amino acid sequence, respectively. Actin expression confirms that similar amounts of protein were loaded in each lane.

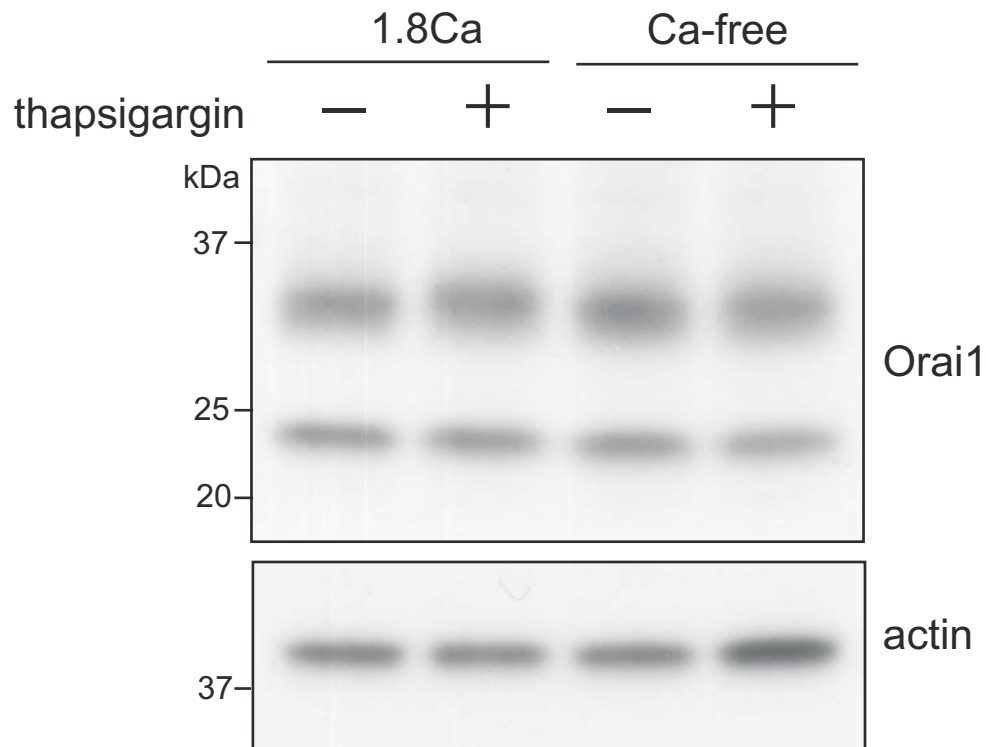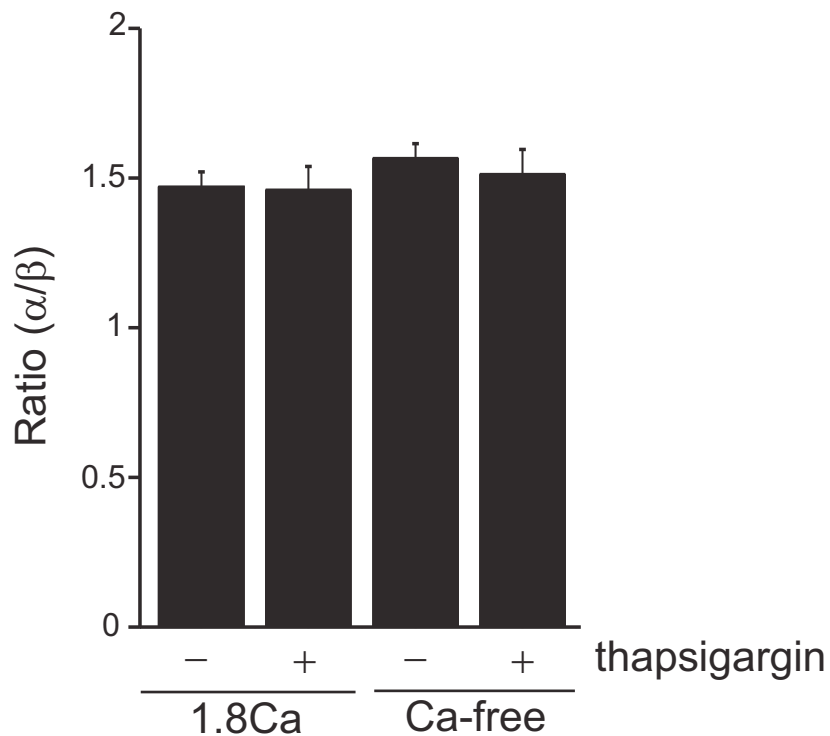

**Fig. S3. Levels of Orai1 protein forms are not affected by store depletion in HEK293 cells.** Western blot showing the expression of Orai1 protein in HEK293 cells treated with thapsigargin for one hour in the presence or absence of extracellular Ca<sup>2+</sup>. Cells were lysed in RIPA buffer. After overnight treatment with PNGaseF, samples were dissolved by 10% SDS-PAGE and analyzed by Western blotting using an anti-Orai1 antibody. Actin expression confirms that similar amounts of protein were loaded in each lane. Representative blot from three independent experiments is shown. Lower panel shows the ration of Orai1 $\alpha$  and Orai1 $\beta$  quantified by densitometric analysis.
